# Supplementary material
Source: publisher figshare collection journal article supplement (https://aacr.figshare.com/articles/dataset/_/22469903)

# Figure S5

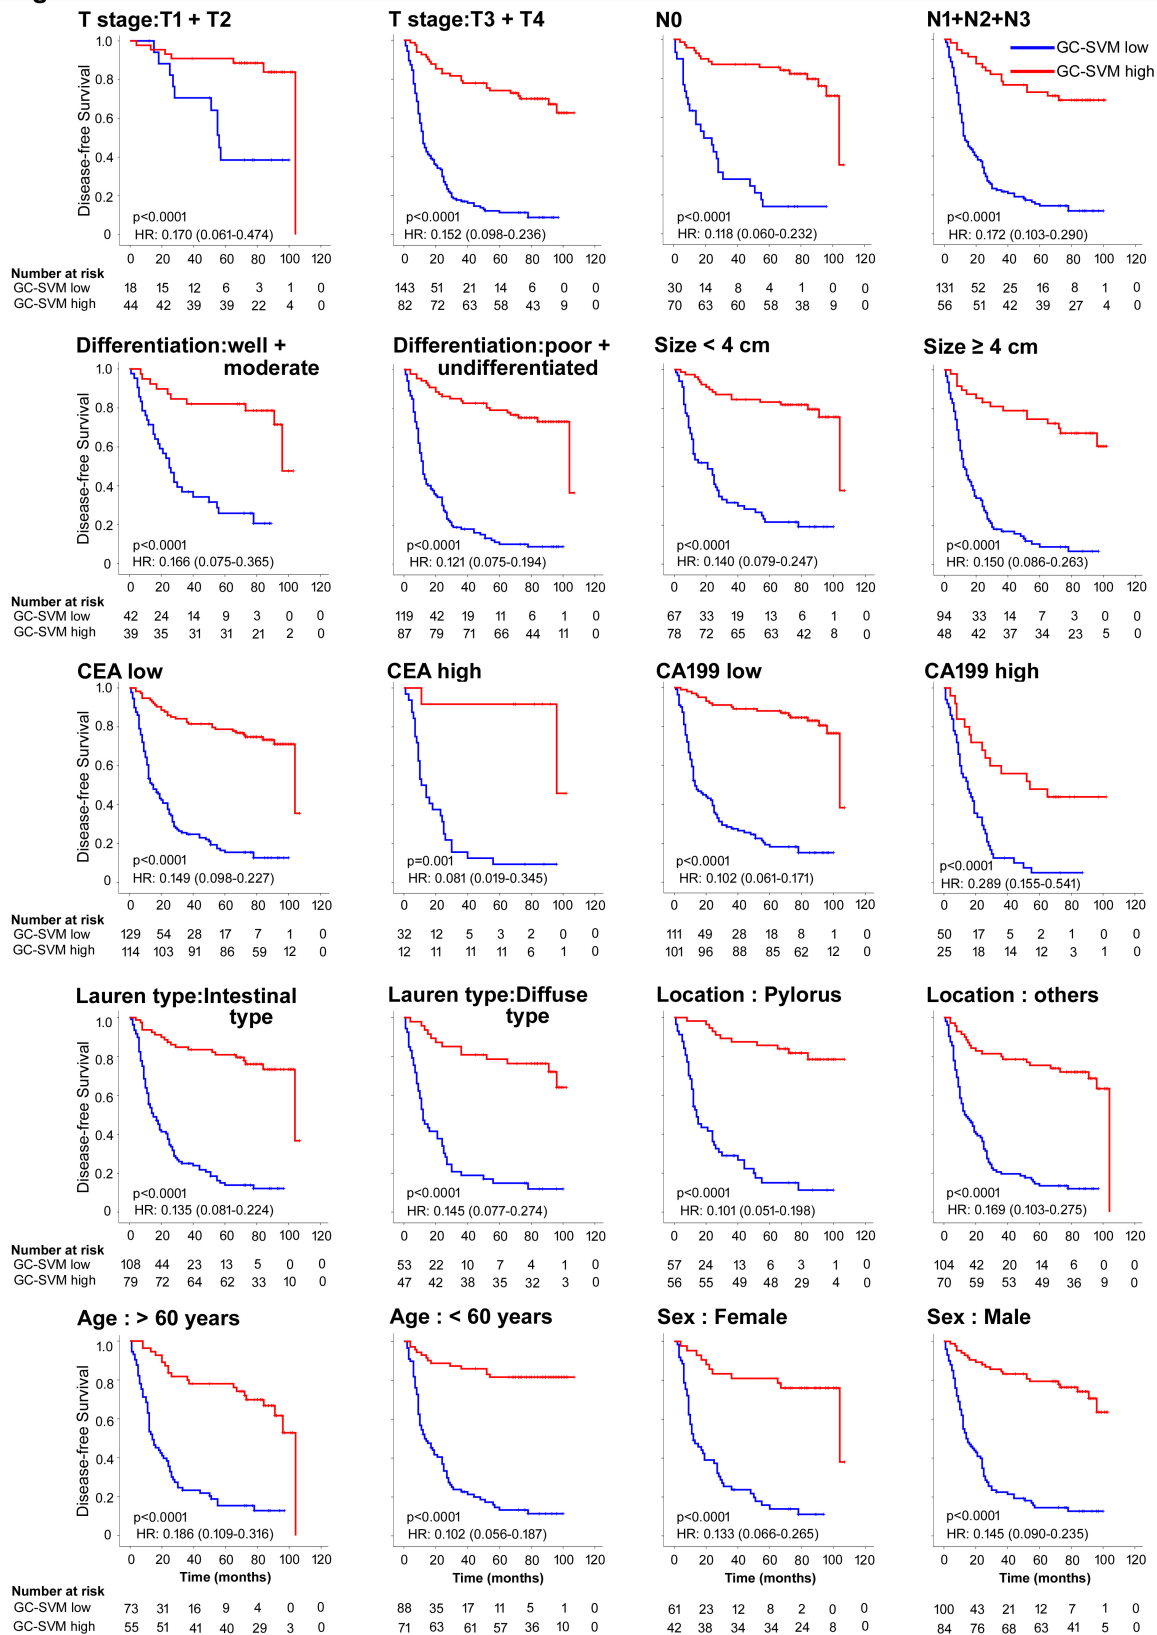

Supplement: Supplementary file 1 [file 39921389]
